# Supplementary material for: Genome-wide inference reveals that feedback regulations constrain promoter-dependent transcriptional burst kinetics
Source: PubMed Central journal article supplement (PMC9874261; doi:10.1093/nar/gkac1204), 2022-12-30
Supplement: gkac1204_supplemental_file.pdf [file gkac1204_supplemental_file.pdf]

## Supplementary File

### Genome-wide inference reveals that feedback regulations constrain promoter-dependent transcriptional burst kinetics

Songhao Luo<sup>1,2,†</sup>, Zihao Wang<sup>1,2,†</sup>, Zhenquan Zhang<sup>1,2</sup>, Tianshou Zhou<sup>1,2,\*</sup>, and Jiajun Zhang<sup>1,2,\*</sup>

<sup>1</sup> Guangdong Province Key Laboratory of Computational Science, Sun Yat-sen University, Guangzhou 510275, P. R. China

<sup>2</sup> School of Mathematics, Sun Yat-sen University, Guangzhou, Guangdong Province, 510275, P. R. China

† These authors contributed equally to this work.

\* To whom correspondence should be addressed.

Email: [mcszhtsh@mail.sysu.edu.cn](mailto:mcszhtsh@mail.sysu.edu.cn), [zhjiajun@mail.sysu.edu.cn](mailto:zhjiajun@mail.sysu.edu.cn)

# Content

|                                                             |           |
|-------------------------------------------------------------|-----------|
| <b>1. Supplementary Text .....</b>                          | <b>3</b>  |
| 1.1 Hierarchical model .....                                | 3         |
| Measurement model.....                                      | 3         |
| Gene expression model.....                                  | 4         |
| Hierarchical model for autoregulatory feedback system ..... | 7         |
| 1.2 Telegraph model.....                                    | 8         |
| <b>2. Supplementary Figures .....</b>                       | <b>10</b> |
| <b>3. Supplementary Table .....</b>                         | <b>22</b> |
| <b>4. Reference .....</b>                                   | <b>25</b> |

## 1. Supplementary Text

### 1.1 Hierarchical model

Observed scRNA-seq counts are a noisy reflection of true gene-expression levels. We model the observed counts as a hierarchical model (Supplementary Figure S1a), which captures two core mechanistic processes: a sequencing measurement process (Supplementary Figure S1b) and a gene expression process (Supplementary Figure S1c). To make this idea precise, we let  $n$  denote the true number of mRNAs expressed in cells, following the stationary distribution  $P_{\text{gene}}(n)$  from a specific gene expression system. Let  $y$  denote the observed number of mRNA molecules in cells, which in principle follows a conditional distribution denoted by  $P_{\text{meas}}(y|n)$ . Thus, the framework of the hierarchical model can be mathematically described as

$$\begin{aligned} P_{\text{obs}}(Y = y; \cdot) &= P_{\text{meas}}(y|n) \wedge_n P_{\text{gene}}(n) \\ &= \int_0^{\infty} P_{\text{meas}}(y|n) P_{\text{gene}}(n) dn \end{aligned} \quad (\text{S1})$$

where the  $\wedge$  notation represents the mixtures of distributions. Next, we rationalize our hierarchical model through the following detailed analyses.

#### **Measurement model**

First, we can couple a sequencing process into a gene expression model via the measurement model  $P_{\text{meas}}(y|n)$  of scRNA-seq data (1). This is because the reads we observed are actually sampled from the true number of mRNAs by sequencing instruments. Assume that the observed reads of scRNA-seq data are the sampling result of mRNA without replacement, and that we can use a hypergeometric distribution to describe the measurement process (Supplementary Figure S1b). In general, hypergeometric distribution is computationally challenging, but we can use a binomial distribution to approximate it if the sample number is much smaller than the total number, i.e.,

$$Y \sim P_{\text{meas}}(y|n) = \text{Binomial}(n, \lambda), \quad (\text{S2})$$

where  $\lambda \in [0,1]$  is the sampling probability in the sequencing process.

Note that a discrete gene expression model can be written in a Poisson representation, that is,

$$\begin{aligned} P_{\text{gene}}(n) &= \int_0^{\infty} \text{Poisson}(n|x) f(x) dx \\ &\triangleq \text{Poisson}(n|x) \wedge_x f(x). \end{aligned} \quad (\text{S3})$$

where  $f(x)$  is a kernel density function. Then, we can use the following hierarchical model to describe the observed number by taking a binomial distribution as a measurement model (Eq. (S2)),

$$Y \sim \text{Binomial}(n, \lambda) \wedge_n \text{Poisson}(n|x) \wedge_x f(x). \quad (\text{S4})$$

Note that for the mixture distribution  $\text{Binomial}(n, \lambda) \wedge_n \text{Poisson}(n|x)$ , we can derive its probability-generating function

$$\begin{aligned} G(z) &= \sum_{i=0}^{\infty} \sum_{n=0}^{\infty} \frac{n! \lambda^i (1-\lambda)^{n-i} e^{-x} x^n z^i}{i!(n-i)!n!} \\ &= \sum_{n=0}^{\infty} (1-\lambda + \lambda z)^n \frac{e^{-x} x^n}{n!} \\ &= e^{x(1-\lambda+\lambda z)-x} = e^{\lambda x(z-1)}, \end{aligned} \quad (\text{S5})$$

which is the probability generating functions of  $\text{Poisson}(\lambda x)$ . Thus, Eq. (S4) can be rewritten as

$$Y \sim \text{Poisson}(y|\lambda x) \wedge_x f(x) \quad (\text{S6})$$

which is actually a Poisson representation for scRNA-seq data with a factor  $\lambda$ .

### Gene expression model

In this section, we discuss a discrete gene-expression model (described by  $P_{\text{gene}}(n)$ ) that can simultaneously characterize transcriptional burst kinetics and feedback regulations. Since transcription factors (TFs) are often taken as feedback regulators, a gene expression model with feedback should consider protein levels. However, techniques for genome-wide measurement of proteomics are not yet sufficient for this consideration. An alternative approach is to use high-throughput scRNA-seq data to replace the protein levels (Supplementary Figure S1c) (2), and this is reasonable since the abundances of mRNA and protein are highly related (3). In the following, we rationalize that scRNA-seq data are suitable for the inference of feedback type by using Eq. (4) in the main text.

First, let us consider a transcription model with feedback regulation, described by the following reaction scheme

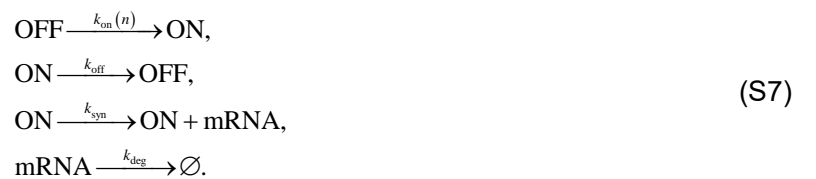

where  $k_{\text{on}}$  and  $k_{\text{off}}$  are the promoter's activation and inactivation rates respectively,  $k_{\text{syn}}$  and  $k_{\text{deg}}$  are the mRNA's synthesis and degradation rates respectively. Here we consider that only the promoter activation rate is auto-regulated by TFs (4,5), and assume that the number of proteins (TFs) is proportional to the number of mRNAs, i.e., the number of proteins is  $r \cdot n$ , where  $n$  is the mRNAs numbers and  $r$  is a constant ratio factor. The regulation of the activation process by proteins is characterized by a Hill function. Let  $P_{\text{off}}(n, t)$  and  $P_{\text{on}}(n, t)$  be the probability that there are  $n$  mRNAs in OFF state and ON state at time  $t$ , respectively. We then write two chemical master equations (CMEs) for Eq. (S7)

$$\begin{aligned}
\frac{\partial P_{\text{off}}(n, t)}{\partial t} &= -k_{\text{on}} \left[ \frac{K^h}{K^h + (rn)^h} + \varepsilon \right] P_{\text{off}}(n, t) + k_{\text{off}} P_{\text{on}}(n, t) \\
&\quad + k_{\text{deg}} \left[ (n+1) P_{\text{off}}(n+1, t) - n P_{\text{off}}(n, t) \right], \\
\frac{\partial P_{\text{on}}(n, t)}{\partial t} &= k_{\text{on}} \left[ \frac{K^h}{K^h + (rn)^h} + \varepsilon \right] P_{\text{off}}(n, t) - k_{\text{off}} P_{\text{on}}(n, t) \\
&\quad + k_{\text{deg}} \left[ (n+1) P_{\text{on}}(n+1, t) - n P_{\text{on}}(n, t) \right] \\
&\quad + k_{\text{syn}} \left[ P_{\text{on}}(n-1, t) - P_{\text{on}}(n, t) \right].
\end{aligned} \tag{S8}$$

where  $K$  denotes the dissociation constant between the promoter and proteins, and  $\varepsilon = k_{\varepsilon}/k_{\text{on}}$  with  $k_{\varepsilon}$  being the basal activation rate represents a basal burst rate in the absence of regulation. Note that the Hill coefficient  $h > 0$  corresponds to negative feedback, and  $h < 0$  to positive feedback.

Next, we find the stationary mRNA distribution  $P_{\text{gene}}(n) = \lim_{t \rightarrow \infty} [P_{\text{off}}(n, t) + P_{\text{on}}(n, t)]$  by introducing a Poisson representation. For this, we define two kernel density functions  $f_{\text{off}}(x, t)$  and  $f_{\text{on}}(x, t)$  according to the following relationships

$$\begin{aligned}
P_{\text{off}}(n, t) &= \int_0^{x_{\text{max}}} \frac{x^n e^{-x}}{n!} f_{\text{off}}(x, t) dx, \\
P_{\text{on}}(n, t) &= \int_0^{x_{\text{max}}} \frac{x^n e^{-x}}{n!} f_{\text{on}}(x, t) dx,
\end{aligned} \tag{S9}$$

where  $x_{\text{max}}$  is the maximum of the maximum values of functions  $f_{\text{off}}(x, t)$  and  $f_{\text{on}}(x, t)$  with regard to  $x$ . Note that the total kernel density function  $f(x, t) = f_{\text{off}}(x, t) + f_{\text{on}}(x, t)$  satisfies the normalization condition  $\int_0^{x_{\text{max}}} f(x, t) dx = 1$ . Substituting Eq. (S9) into Eq. (S8), multiplying  $n$  on both sides of Eq. (S8), and summing up  $n$  from 0 to infinity approximately, we obtain the following differential Chapman-Kolmogorov equations for  $f_{\text{off}}(x, t)$  and  $f_{\text{on}}(x, t)$ ,

$$\begin{aligned}\frac{\partial f_{\text{off}}(x,t)}{\partial t} &= -k_{\text{on}} \left[ \frac{K^h}{K^h + (rx)^h} + \varepsilon \right] f_{\text{off}}(x,t) + k_{\text{off}} f_{\text{on}}(x,t) - \frac{\partial}{\partial \lambda} J_{\text{off}}(x;t), \\ \frac{\partial f_{\text{on}}(x,t)}{\partial t} &= k_{\text{on}} \left[ \frac{K^h}{K^h + (rx)^h} + \varepsilon \right] f_{\text{off}}(x,t) - k_{\text{off}} f_{\text{on}}(x,t) - \frac{\partial}{\partial \lambda} J_{\text{on}}(x;t),\end{aligned}\tag{S10}$$

with the no-flux boundary conditions  $J_{\text{off}}(0;t) = J_{\text{off}}(x_{\text{max}};t) = 0$ , and  $J_{\text{on}}(0;t) = J_{\text{on}}(x_{\text{max}};t) = 0$ , where  $J_{\text{off}}(x;t) = -k_{\text{deg}} x f_{\text{off}}(x,t)$  and  $J_{\text{on}}(x;t) = (k_{\text{syn}} - k_{\text{deg}} x) f_{\text{on}}(x,t)$ . It is reasonable to choose  $x_{\text{max}} = k_{\text{syn}}/k_{\text{deg}}$  to make the boundary terms vanish. Thus, the boundary conditions imply that  $f_{\text{off}}(k_{\text{syn}}/k_{\text{deg}}, t) = 0$  and  $f_{\text{on}}(0,t) = 0$ .

From Eq. (S10), we find that the stationary distribution  $f(x) = \lim_{t \rightarrow \infty} [f_{\text{off}}(x,t) + f_{\text{on}}(x,t)]$  takes the form

$$f(\hat{x}) = C \hat{x}^{\tilde{k}_{\text{on}}(\varepsilon+1)-1} (1-\hat{x})^{\tilde{k}_{\text{off}}-1} \left( 1 + (r\hat{x}/\hat{K})^h \right)^{-\tilde{k}_{\text{on}}/h},\tag{S11}$$

where  $\hat{x} = x/\tilde{k}_{\text{syn}}$ ,  $\hat{K} = K/\tilde{k}_{\text{syn}}$ ,  $\tilde{k}_{\text{syn}} = k_{\text{syn}}/k_{\text{deg}}$ ,  $\tilde{k}_{\text{on}} = k_{\text{on}}/k_{\text{deg}}$ ,  $\tilde{k}_{\text{off}} = k_{\text{off}}/k_{\text{deg}}$ , and  $C$  is a normalization constant. Note that  $\hat{x}$  represents a non-dimensional mRNA quantity normalized by  $x_{\text{max}}$ .

Now, we consider the case of bursty expression (i.e., assuming  $\tilde{k}_{\text{off}} \gg \tilde{k}_{\text{on}} > 1$ ) (4,6). In this case, function  $f(\hat{x})$  can be approximated as

$$\begin{aligned}f(\hat{x}) &= C \hat{x}^{\tilde{k}_{\text{on}}(\varepsilon+1)-1} \left( 1 - \frac{\tilde{k}_{\text{off}} \hat{x}}{\tilde{k}_{\text{off}}} \right)^{\tilde{k}_{\text{off}}-1} \left( 1 + (r\hat{x}/\hat{K})^h \right)^{-\tilde{k}_{\text{on}}/h} \\ &\approx \tilde{C} \hat{x}^{\tilde{k}_{\text{on}}(\varepsilon+1)-1} e^{-\tilde{k}_{\text{off}} \hat{x}} \left( 1 + (r\hat{x}/\hat{K})^h \right)^{-\tilde{k}_{\text{on}}/h}.\end{aligned}\tag{S12}$$

where  $\tilde{C}$  is a normalization constant. Therefore, the stationary mRNA distribution  $P_{\text{gene}}(n)$  is given by

$$P_{\text{gene}}(n) = \int_0^1 \text{Poisson}(n | \tilde{k}_{\text{syn}} \hat{x}) f(\hat{x}) d\hat{x}.\tag{S13}$$

To verify the correctness of Eq. (S13) obtained from Eq. (S7), we use the mRNA distribution generated by the Gillespie algorithm to compare it with the theoretically approximate solution obtained by substituting Eq. (S11) or Eq. (S12) into Eq. (S13). From Supplementary Figure S1d-g, we observe that the approximate theoretical results fit well with the numerically generated data, whatever in positive and negative feedback cases. This indicates that the stationary solution of the discrete gene expression model (Eq. (S7)) can be well described by Poisson representation.

Noting that the relationship  $\hat{x} = x/x_{\text{max}} = x/\tilde{k}_{\text{syn}}$  and substituting Eq. (S12) into Eq. (S13), we find that the stationary distribution characterized by the burst parameters can be finally expressed as

$$P_{\text{gene}}(n) = \tilde{C} \int_0^{\infty} \text{Poisson}(n|x) x^{a(\varepsilon+1)-1} e^{-x/b} \left(1 + (x/k)^h\right)^{-a/h} dx. \quad (\text{S14})$$

where  $a = \tilde{k}_{\text{on}}$  is burst frequency,  $b = \tilde{k}_{\text{syn}} / \tilde{k}_{\text{off}}$  is burst size and  $k = K/r$  is a parameter.

### **Hierarchical model for autoregulatory feedback system**

Since the feedback system Eq. (S7) can be described by a Poisson representation, i.e., Eq. (S14), we can choose the binomial distribution given by Eq. (S2) as the measurement model. Using Eq. (S6), the observed mRNA expression distribution of scRNA-seq data is calculated according to

$$\begin{aligned} P_{\text{obs}}(y) &= \int_0^{\infty} \text{Poisson}(y|\lambda x) f(x) dx \\ &= \tilde{C} \int_0^{\infty} \text{Poisson}(y|\lambda x) x^{a(\varepsilon+1)-1} e^{-x/b} \left(1 + (x/k)^h\right)^{-a/h} dx. \end{aligned} \quad (\text{S15})$$

From the above analysis, we can see that the hierarchical model described by Eq. (S15) is an interpretable and mechanistic one. Moreover, it can be used in the simultaneous inference of transcriptional burst kinetics and feedback (as shown in the main text) since we can extract five significant parameters  $\theta = (a, b, \varepsilon, k, h)$  of the auto-regulatory feedback system from scRNA-seq data.

We emphasize that the kernel density function  $f(x)$  in Eq. (S15) is in a form similar to the stationary distribution from (7), but the authors in that paper used a continuous stationary distribution to characterize translational bursting. In contrast, we use a hierarchical model, which combines the measurement process with a binomial distribution and the gene-expression process with a discrete stationary distribution (i.e., Eq. (S14)), to infer transcriptional bursting kinetics and feedback forms from scRNA-seq data.

## 1.2 Telegraph model

The classical telegraph model considers two gene states: an OFF state where the gene is not expressed and an ON state where the gene is transcribed. Specifically, the switching rates from OFF to ON and from ON to OFF are  $k_{\text{on}}$  and  $k_{\text{off}}$ , respectively. The gene transcription rate is  $k_{\text{syn}}$  and the mRNA degradation rate is  $k_{\text{deg}}$ . The model is described by the following four reactions:

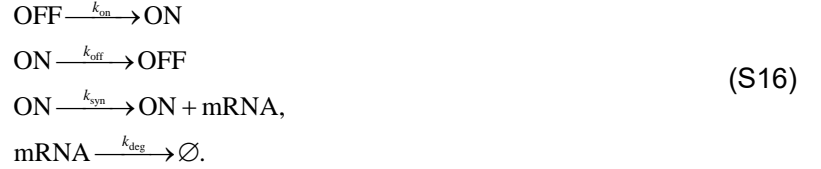

Moreover, it is assumed that all the reaction events involved are Markovian, i.e., the probability that the reaction events happen depends only on the present state of the system, independent of the prior history.

Let  $P(x; t)$  represent the probability that the mRNA has  $x$  molecules at time  $t$ . The steady-state distribution of these equations has been shown (8) to take the form

$$P(x) = \frac{\Gamma(\tilde{k}_{\text{on}} + x) \Gamma(\tilde{k}_{\text{on}} + \tilde{k}_{\text{off}})}{\Gamma(\tilde{k}_{\text{on}}) \Gamma(\tilde{k}_{\text{on}} + \tilde{k}_{\text{off}} + x)} \frac{\tilde{k}_{\text{syn}}^x}{x!} {}_1F_1(\tilde{k}_{\text{on}} + x; \tilde{k}_{\text{on}} + \tilde{k}_{\text{off}} + x; -\tilde{k}_{\text{syn}}), \tag{S17}$$

where the switching rates are in unit of mRNA decay rate, i.e.,  $\tilde{k}_{\text{on}} = k_{\text{on}}/k_{\text{deg}}$ ,  $\tilde{k}_{\text{off}} = k_{\text{off}}/k_{\text{deg}}$ ,  $\tilde{k}_{\text{syn}} = k_{\text{syn}}/k_{\text{deg}}$ . Moreover, the distribution in Eq. (S17) can be regarded as a Poisson-Beta distribution (9), i.e., the mixture of a Poisson distribution and a Beta distribution. Specifically, if the Poisson distribution has a mean  $\tilde{k}_{\text{syn}} t$ , where  $\tilde{k}_{\text{syn}}$  is a scale parameter and  $t$  follows the Beta distribution with parameters  $(\tilde{k}_{\text{on}}, \tilde{k}_{\text{off}})$ , then the expression of  $P(x)$  can be reproduced by calculating

$$P(x) = \int_0^1 \frac{(\tilde{k}_{\text{syn}} t)^x}{x!} e^{-\tilde{k}_{\text{syn}} t} \frac{t^{\tilde{k}_{\text{on}}-1} (1-t)^{\tilde{k}_{\text{off}}-1}}{B(\tilde{k}_{\text{on}}, \tilde{k}_{\text{off}})} dt, \tag{S18}$$

In spite of this fact, calculating the integral in Eq. (S18) is time-consuming. Therefore, we exploit the Gauss-Jacobi quadrature method (10) to compute Eq. (S18). If changing the variable  $u = 2t - 1$ , Eq. (S18) can be rewritten as

$$P(x) = \frac{1}{B(\tilde{k}_{\text{on}}, \tilde{k}_{\text{off}})} \frac{1}{2^{\tilde{k}_{\text{on}} + \tilde{k}_{\text{off}} - 1}} \int_{-1}^1 \frac{(\tilde{k}_{\text{syn}} (u+1)/2)^x}{x!} e^{-\tilde{k}_{\text{syn}} (u+1)/2} (1+u)^{\tilde{k}_{\text{on}}-1} (1-u)^{\tilde{k}_{\text{off}}-1} du. \tag{S19}$$

Finally, based on the Gauss-Jacobi quadrature method and maximum likelihood estimation method,



we can estimate the model parameters  $(\tilde{k}_{\text{on}}, \tilde{k}_{\text{off}}, \tilde{k}_{\text{syn}})$  and compute the burst size  $\tilde{k}_{\text{syn}}/\tilde{k}_{\text{off}}$ , burst frequency  $\tilde{k}_{\text{on}}^{-1}$  and variability of mRNA.

## 2. Supplementary Figures

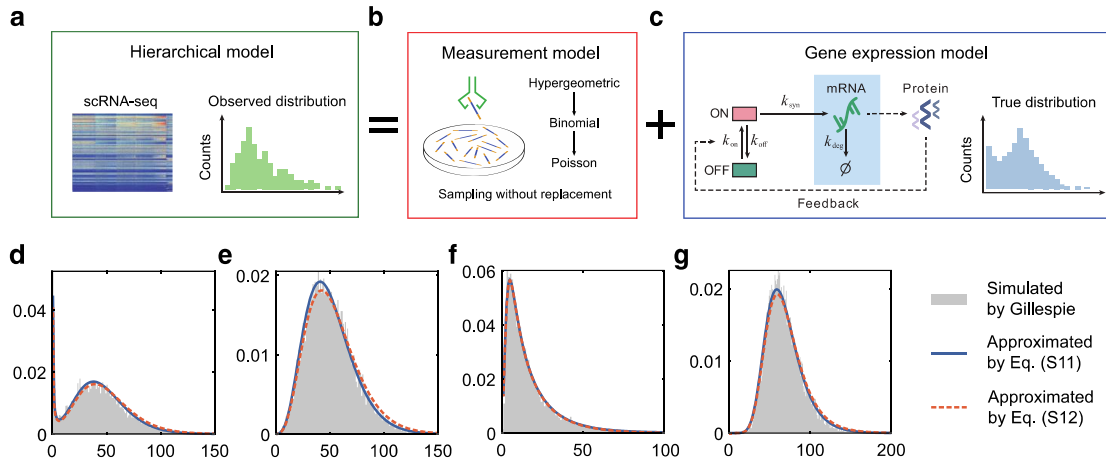

**Supplementary Figure S1. Hierarchical model for generating single-cell data. (a)** Hierarchical model is used in modeling the observed distribution of scRNA-seq data, which can be considered as a coupling of two mechanistic processes: measurement model (b) and gene expression model (c). **(b)** Schematic diagram of the measurement model. The sequencing process can be considered as the sampling without replacement for mRNA. Alternative models can be hypergeometric distributions or approximate Binomial distributions. **(c)** Schematic diagram of a gene-expression model. The proteins produced by mRNA translation can interact back with the gene promoter, thus affecting the rate of state switching. The shading indicates the transcriptome data used to replace protein abundance in the actual inference, under the assumption of linear dependence of mRNA and protein. And this model is used in modeling the ‘true’ distribution of gene expression. **(d-e)** Comparisons of the distributions of simulated (gray histogram) and two approximate theoretical results (The solid blue line corresponds to Eq. (S11), and the dotted orange line corresponds to Eq. (S12)). Parameters values in the case of positive feedback: (d)  $k_{\text{on}} = 5$ ,  $k_{\text{off}} = 100$ ,  $k_{\text{syn}} = 1000$ ,  $K/r = 10$ ,  $h = -2$ ,  $\varepsilon = 0.05$  and  $k_{\text{deg}} = 1$ ; (e)  $k_{\text{on}} = 5$ ,  $k_{\text{off}} = 100$ ,  $k_{\text{syn}} = 1000$ ,  $K/r = 1$ ,  $h = -4$ ,  $\varepsilon = 0.05$  and  $k_{\text{deg}} = 1$ . Parameters values in the case of negative feedback: (f)  $k_{\text{on}} = 10$ ,  $k_{\text{off}} = 50$ ,  $k_{\text{syn}} = 1000$ ,  $K/r = 1$ ,  $h = 2$ ,  $\varepsilon = 0.05$  and  $k_{\text{deg}} = 1$ ; (g)  $k_{\text{on}} = 10$ ,  $k_{\text{off}} = 50$ ,  $k_{\text{syn}} = 1000$ ,  $K/r = 50$ ,  $h = 4$ ,  $\varepsilon = 0.05$  and  $k_{\text{deg}} = 1$ .

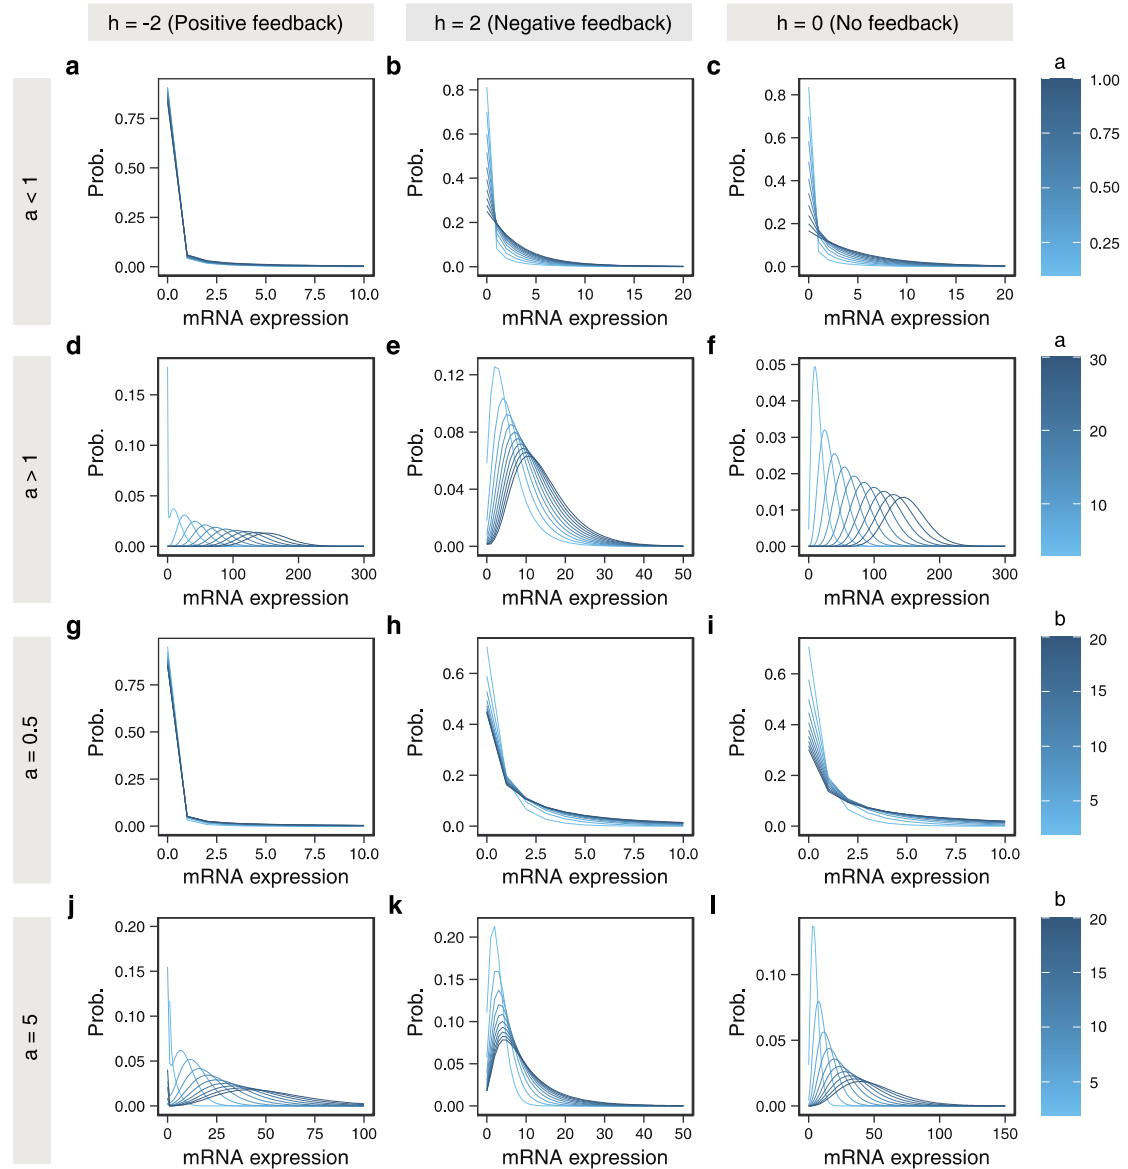

**Supplementary Figure S2. Influences of parameters  $a$  and  $b$  on static mRNA distributions in the hierarchical model**, where the left column is for positive feedback ( $h = -2$ ), the middle column for negative feedback ( $h = 2$ ), and the right column for no feedback ( $h = 0$ ). **(a-f)** Static mRNA distribution for  $a < 1$  (a-c) and for  $a > 1$  (d-f) (see color bars), where the other parameter values are set as  $b = 10$ ,  $\varepsilon = 0.05$ ,  $k = 5$ ,  $\lambda_g = 0.5$ . **(g-l)** Static mRNA distributions for fixed  $a = 0.5$  (g-i) and  $a = 5$  (j-l), where color bars show increases in  $b$ , and the other parameter values are set as  $\varepsilon = 0.05$ ,  $k = 5$ ,  $\lambda_g = 0.5$ .

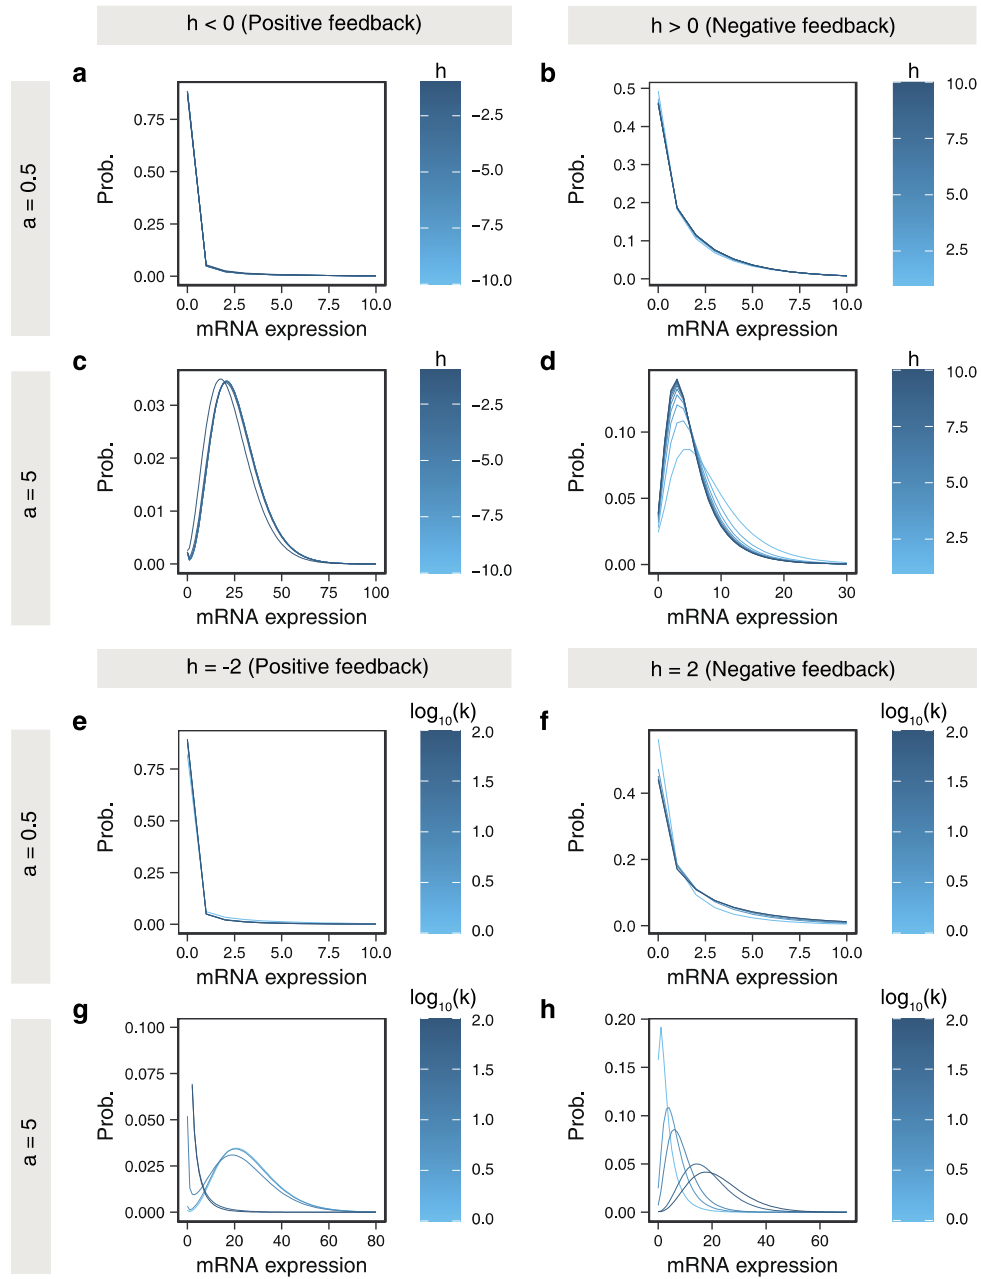

**Supplementary Figure S3. Influences of parameters  $h$  and  $k$  on static mRNA distributions in the hierarchical model**, where the left column is for positive feedback ( $h = -2$ ), and the right column for negative feedback ( $h = 2$ ). **(a-d)** Influences of feedback strengths (color bars) on static mRNA distribution for fixed  $a = 0.5$  (a-b) and for fixed  $a = 5$  (c-d), where the other parameter values are set as  $b = 10$ ,  $\varepsilon = 0.05$ ,  $k = 5$ ,  $\lambda_g = 0.5$ . **(e-h)** Influences of equilibrium binding constant  $k$  (color bars) on static mRNA distribution, where (e-f) is for  $a = 0.5$  and (g-h) for  $a = 5$ , and the other parameter values are set as:  $\varepsilon = 0.05$ ,  $k = 5$ ,  $\lambda_g = 0.5$ .

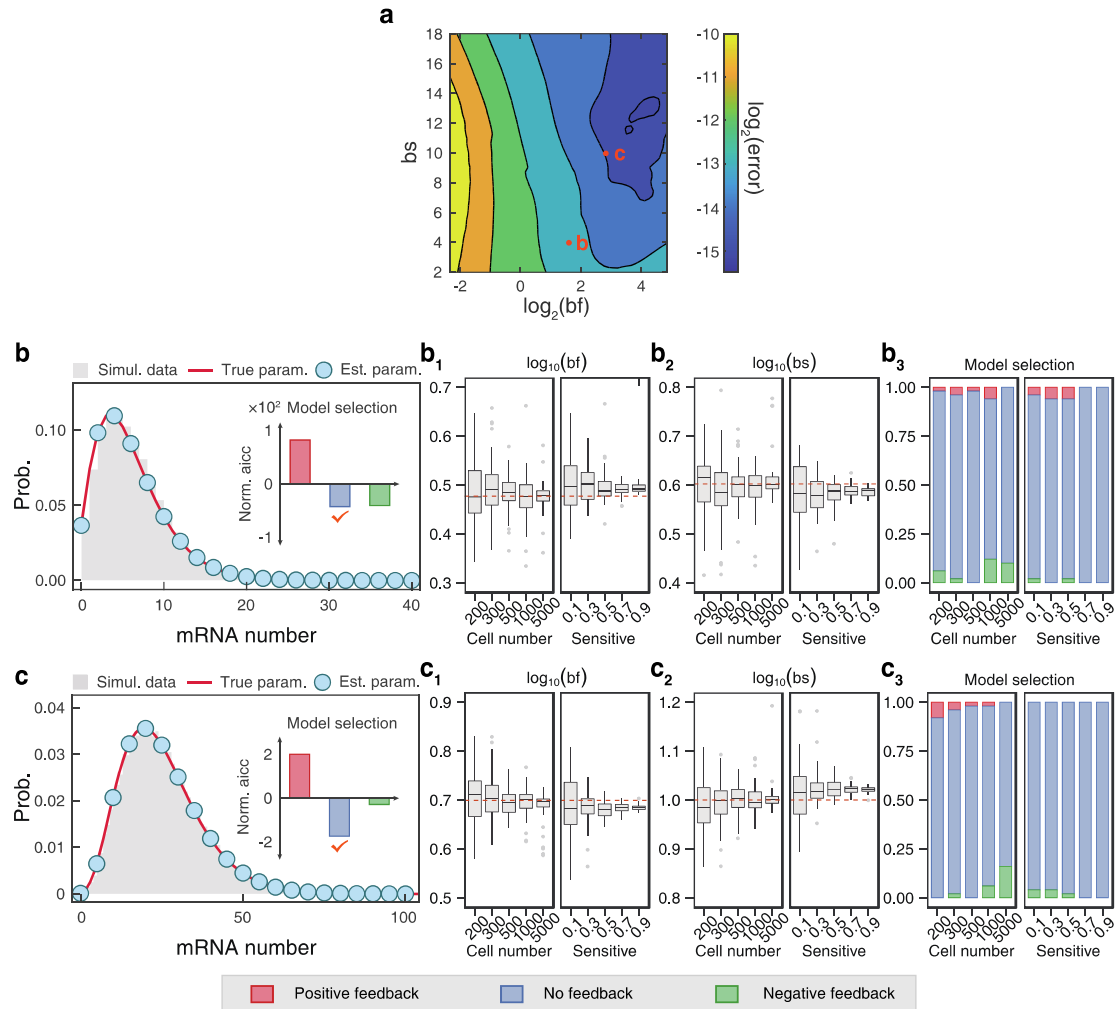

**Supplementary Figure S4. Precision and robustness of inferred results in the case of no feedback.**

**(a)** Contours illustrate the error (color bars) of inferred burst kinetics from simulated expression data. The orange dots represent burst frequencies and sizes in the examples showed in **(b)** and **(c)**. **(b)** mRNA distributions for fixed  $a = 3$ ,  $b = 4$ , where the gray histograms are for simulated data, red solid line for the distribution generated using true kinetic parameters and blue points for the distribution generated using estimated kinetic parameters; Inset: analysis of model selection based on the corrected Akaike information criterion (AICc) that is normalized for visualization convenience, where three colored bars represent the results of model selection for three cases of different feedbacks and the check mark represents the final selected model. **(b<sub>1</sub>-b<sub>3</sub>)** Boxplot of inferred burst frequencies, burst sizes and feedback models as functions of different cell numbers and random deletions (sensitive), where the red dashed line corresponds to the true parameter. **(c and c<sub>1</sub>-c<sub>3</sub>)** Analysis of robustness inference similar to **b** and **b<sub>1</sub>-b<sub>3</sub>** for fixed  $a = 5$ ,  $b = 10$ .

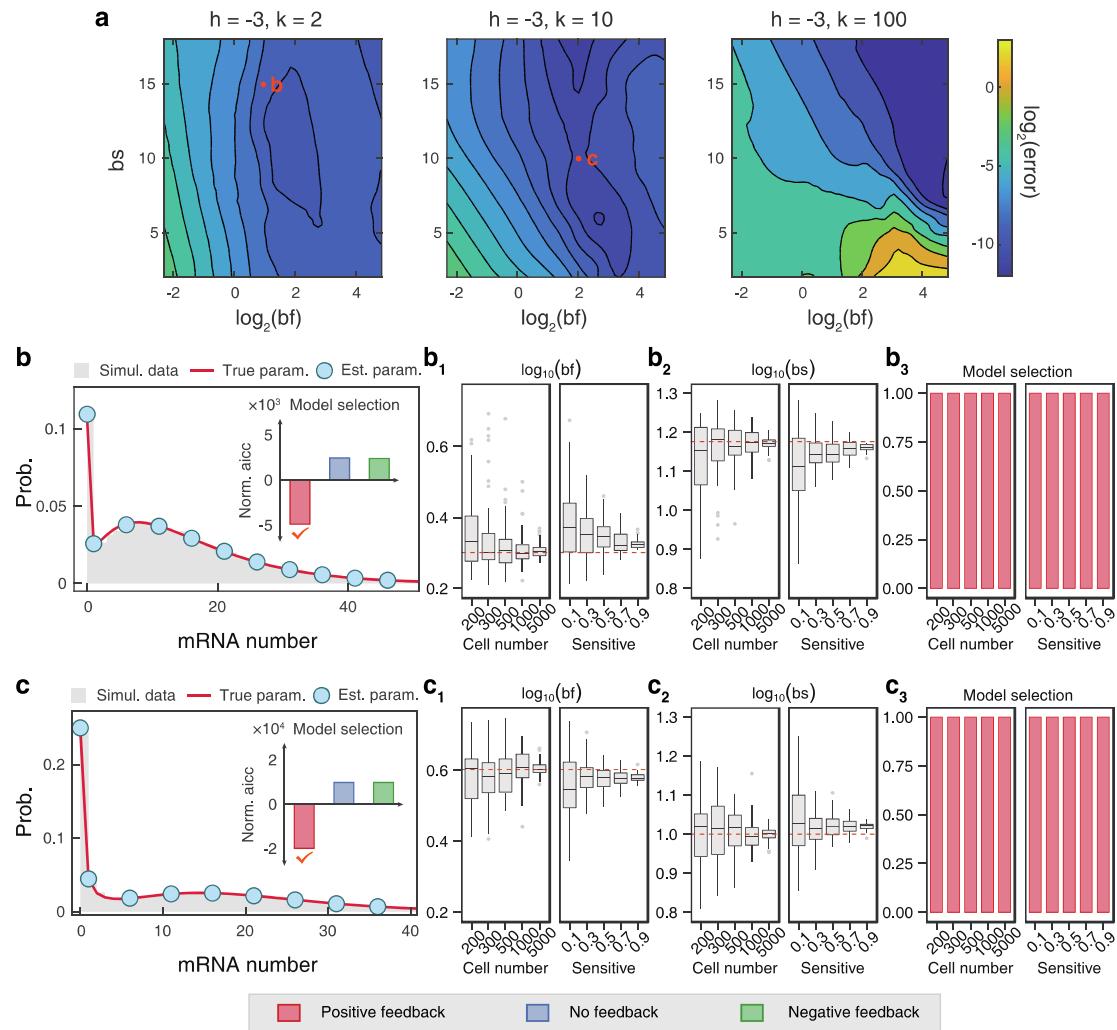

**Supplementary Figure S5. Precision and robustness of inferred results in the case of positive feedback.** **(a)** Contours illustrate the errors (color bars) of inferred burst kinetics for simulated gene-expression data generated by setting different equilibrium binding constants  $k = 2, 10, 100$  (from left to right) and  $h = -3$ . The orange dots represent burst frequencies and sizes for the examples shown in **(b)** and **(c)**. **(b)** mRNA distributions for fixed  $a = 2$ ,  $b = 15$ , where the gray histograms are for simulated data, red solid line for the distribution generated using true kinetic parameters and blue points for the distribution generated using estimated kinetic parameters; Inset: analysis of model selection based on the AICc that is normalized for visualization convenience, where three colored bars represent the results of model selection for three cases of different feedbacks and the check mark represents the final selected model. **(b<sub>1</sub>-b<sub>3</sub>)** Boxplot of inferred burst frequencies, burst sizes and feedback models as functions of different cell numbers and random deletions (sensitive), where the red dashed line corresponds to the true parameter. **(c and c<sub>1</sub>-c<sub>3</sub>)** Analysis of robustness inference similar to **b** and **b<sub>1</sub>-b<sub>3</sub>** for fixed  $a = 4$ ,  $b = 10$ .

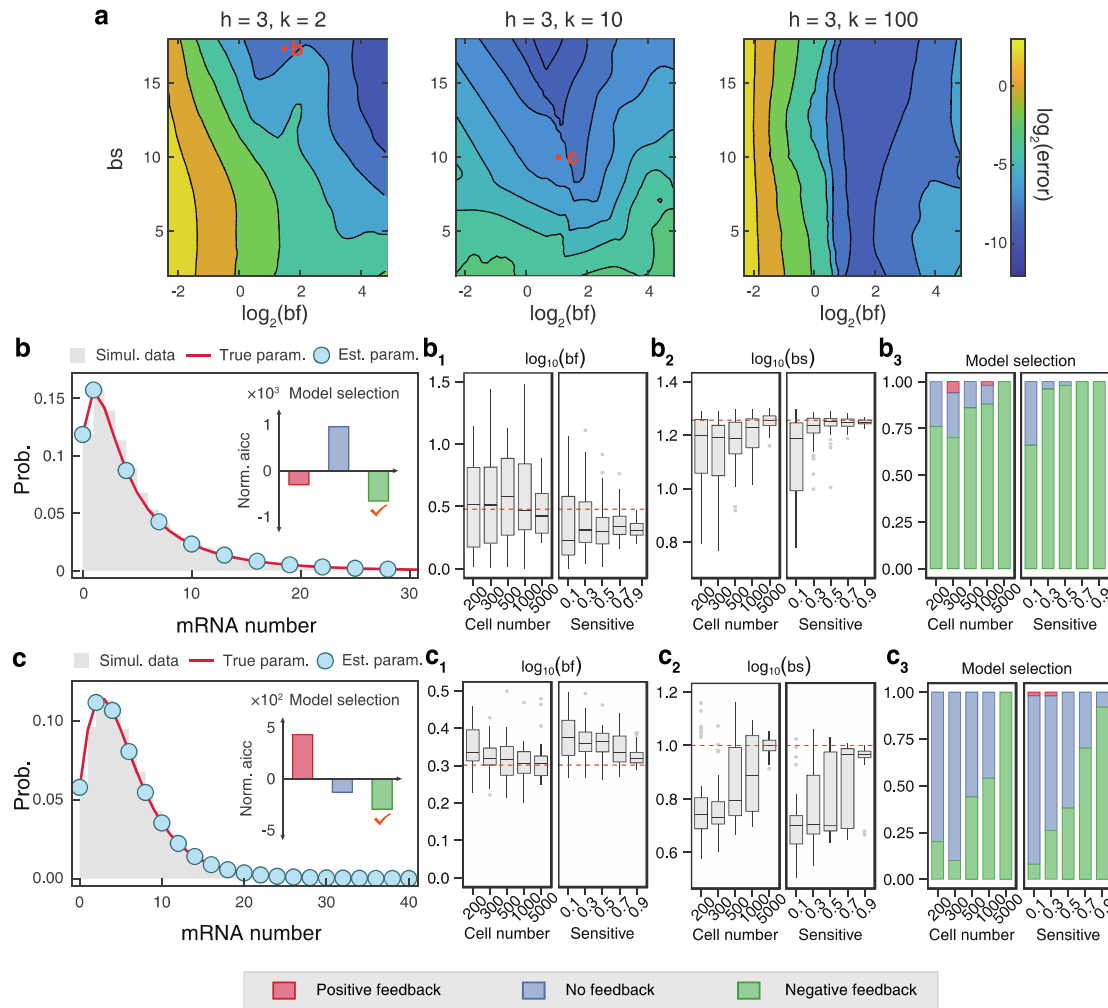

**Supplementary Figure S6. Precision and robustness of inferred results in the case of negative feedback.** (a) Contours illustrate the errors (color bars) of inferred burst kinetics for simulated gene-expression data generated by setting different equilibrium binding constants  $k = 2, 10, 100$  (from left to right) and  $h = 3$ . The orange dots represent burst frequencies and sizes for the examples shown in (b) and (c). (b) mRNA distributions for fixed  $a = 3, b = 18$ , where the gray histograms are for simulated data, red solid line for the distribution generated using true kinetic parameters and blue points for the distribution generated using estimated kinetic parameters; Inset: analysis of model selection based on the AICc that is normalized for visualization convenience, where three colored bars represent the results of model selection for three cases of different feedback and the check mark represents the final selected model. (b<sub>1</sub>-b<sub>3</sub>) Boxplot of inferred burst frequencies, burst sizes and feedback models as functions of different cell numbers and random deletions (sensitive), where the red dashed line corresponds to the true parameter. (c and c<sub>1</sub>-c<sub>3</sub>) Analysis of robustness inference, similar to b and b<sub>1</sub>-b<sub>3</sub> for fixed  $a = 2, b = 10$ .

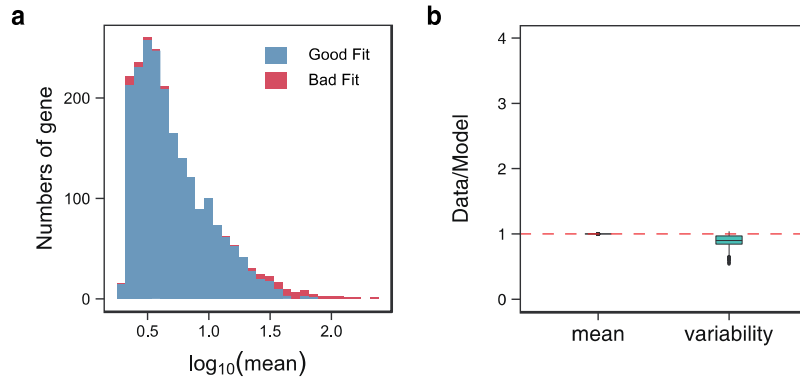

**Supplementary Figure S7. Results for performing goodness-of-fit test analysis. (a)** Demonstration of Goodness-fit test for all inferred genes, where the histogram shows the gene numbers with good-fit (blue color) and bad-fit (red color) vs the mean expression levels. **(b)** Comparison of the mean expression level and the variability ( $CV^2$ ) between the scRNA-seq dataset and the hierarchical model, where the red dashed line represents those results for the model and the data are completely consistent.



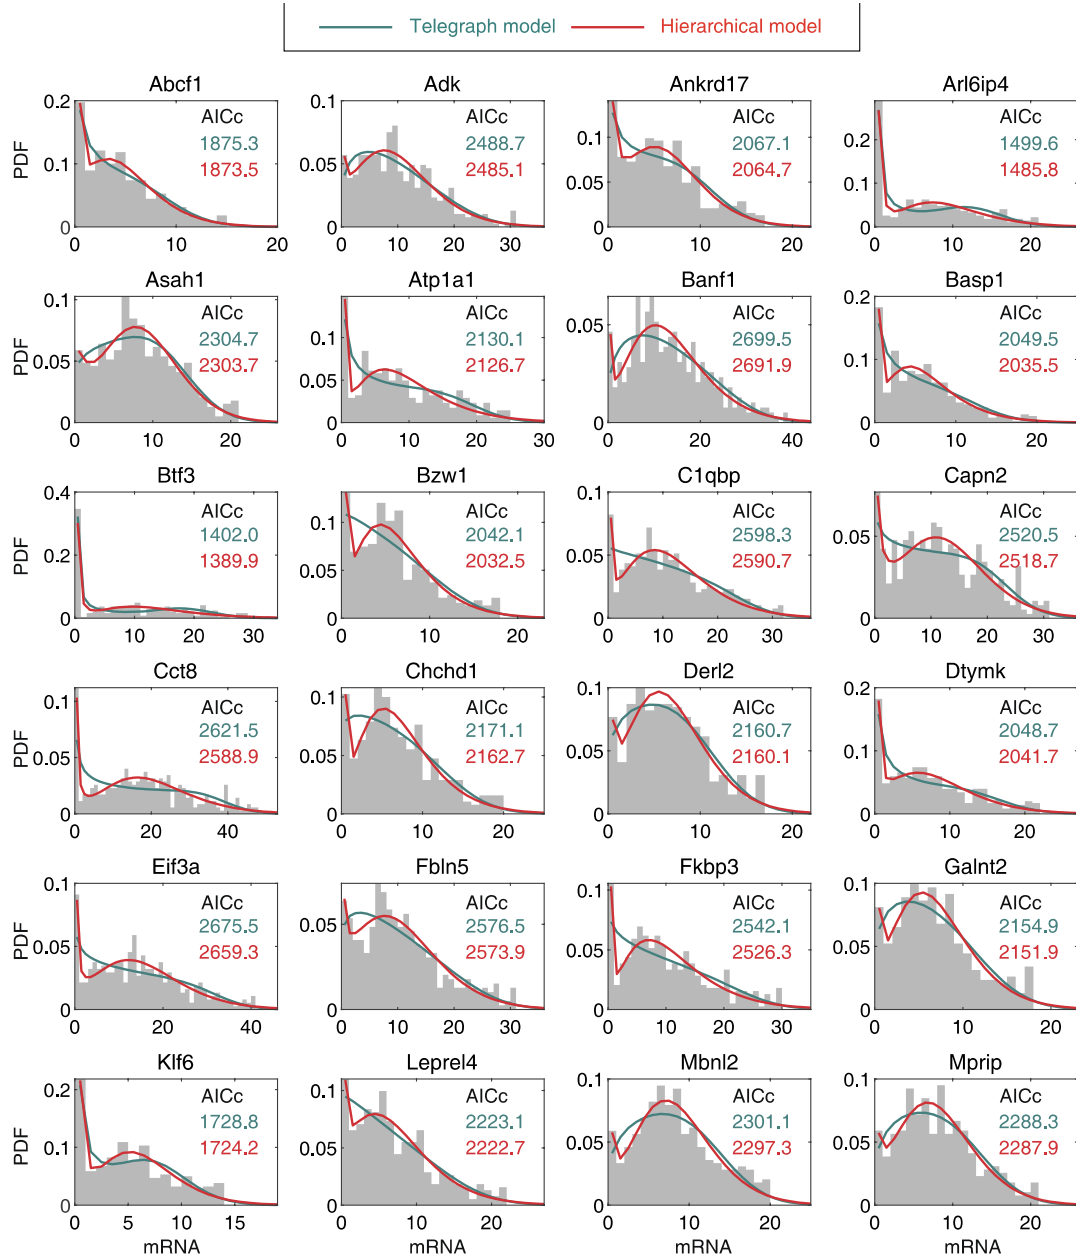

**Supplementary Figure S8. Comparison of fitting and model selection between hierarchical and telegraph models of bimodal distribution.** Bimodal examples for comparison of the inferred distributions between our hierarchical model (orange line) and the telegraph model (green line), where the gray histograms represent the distributions of mRNA counts. Corrected Akaike information criterion (AICc) is calculated for model selection.

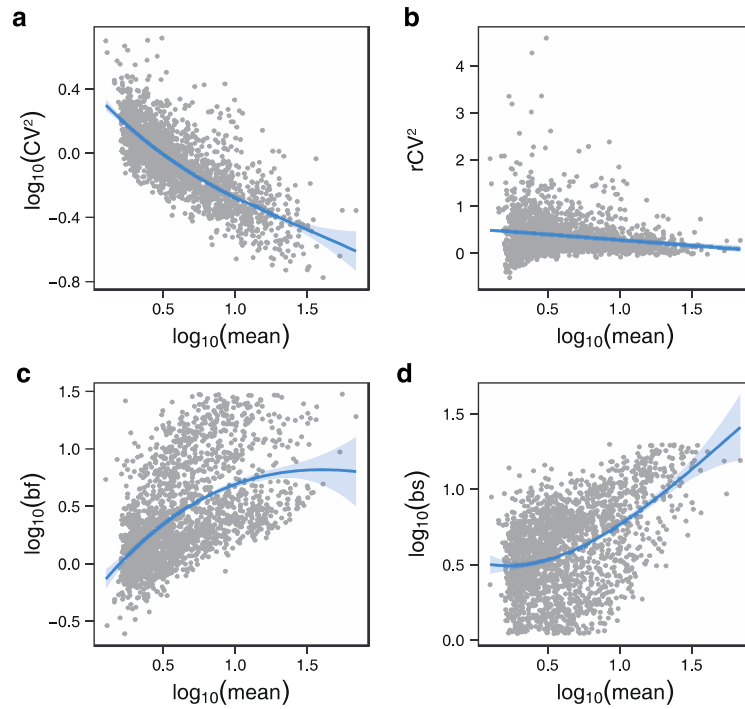

**Supplementary Figure S9. Genome-wide inference of the relationships between kinetic parameters and mean expression levels.** (a) Scatter plot of mean gene-expression levels against expression variability ( $CV^2$ ) for all genes. (b) Scatter plot of mean gene-expression levels against  $rCV^2$  for all genes. (c) Scatter plot of mean gene-expression levels against burst frequencies for all genes. (d) Scatter plot of mean gene-expression levels against burst sizes for all genes. In a-d, the solid lines represent the fitting curves with a cubic spline and the shading represents 95% confidence interval.

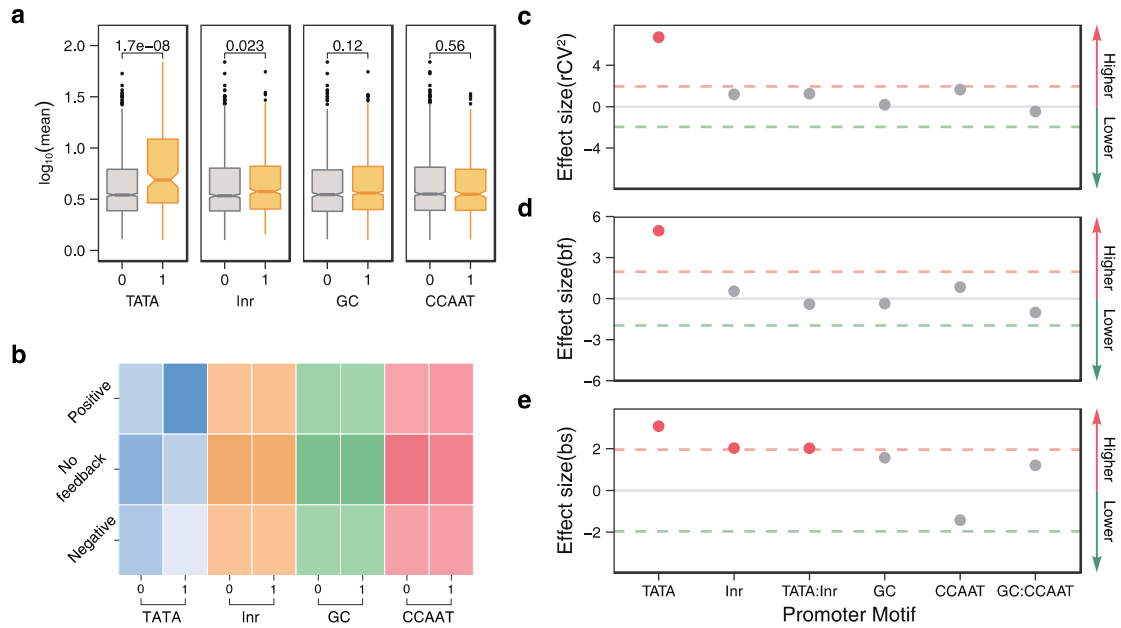

**Supplementary Figure S10. Correlations among promoter motifs, feedbacks and burst kinetics.**

**(a)** Boxplots of the mean expression levels of genes either with (1) or without (0) promoter motifs, where p-value represents the result of Wilcoxon test. **(b)** Correlations between promoter motifs and feedback regulations, where the shades of the color indicate the frequencies in the contingency table, which are normalized by x axis. **(c-e)** Results for the regressions of variability ( $rCV^2$ , c), burst frequencies (d) and burst sizes (e) by using promoter motif features, where each point shows the t-value in a multivariate linear regression model, which is used to judge whether to reject the null hypothesis that the feature has no connection with the dependent variable. Color: Significantly higher (red point), significantly lower (green point) and no significant (gray point) effects.

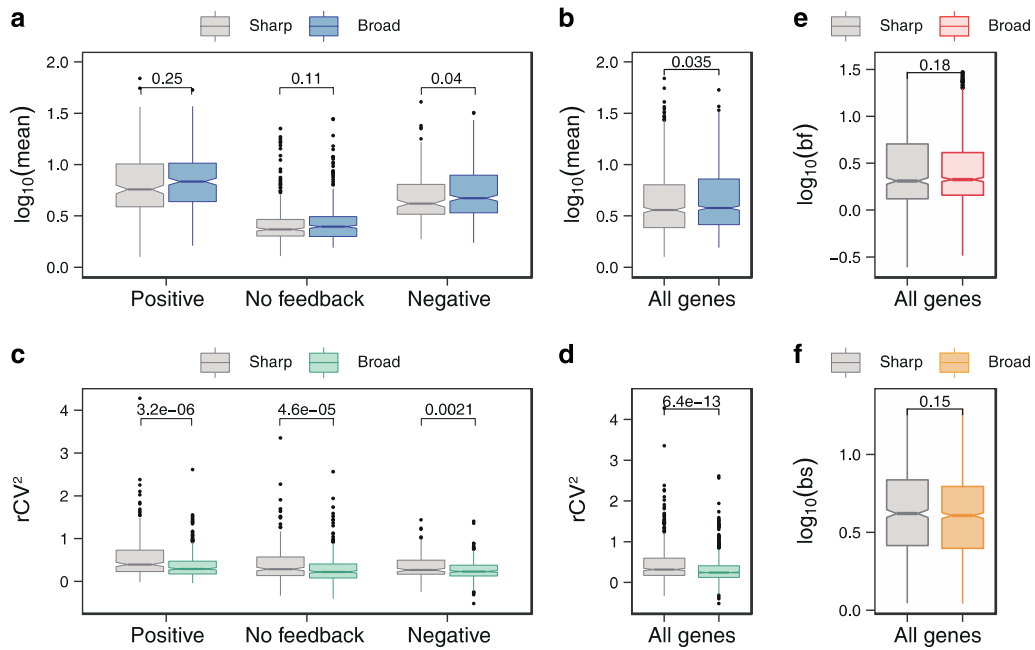

**Supplementary Figure S11. Correlations among TSS distributions, feedbacks and burst kinetics.**

**(a,b)** Boxplots of mean expression level of genes either with sharp TSS distribution or with broad TSS distribution in three cases of different feedbacks (a) and for all genes (b), where the p-values represent the results of Wilcoxon test. **(c,d)** Boxplots of variability of genes either with sharp TSS distribution or with broad TSS distribution in three cases of different feedbacks (c) and for all genes (d). **(e,f)** Boxplots of burst frequency (e) and burst size (f) of genes either with sharp TSS distribution or with broad TSS distribution for all genes.

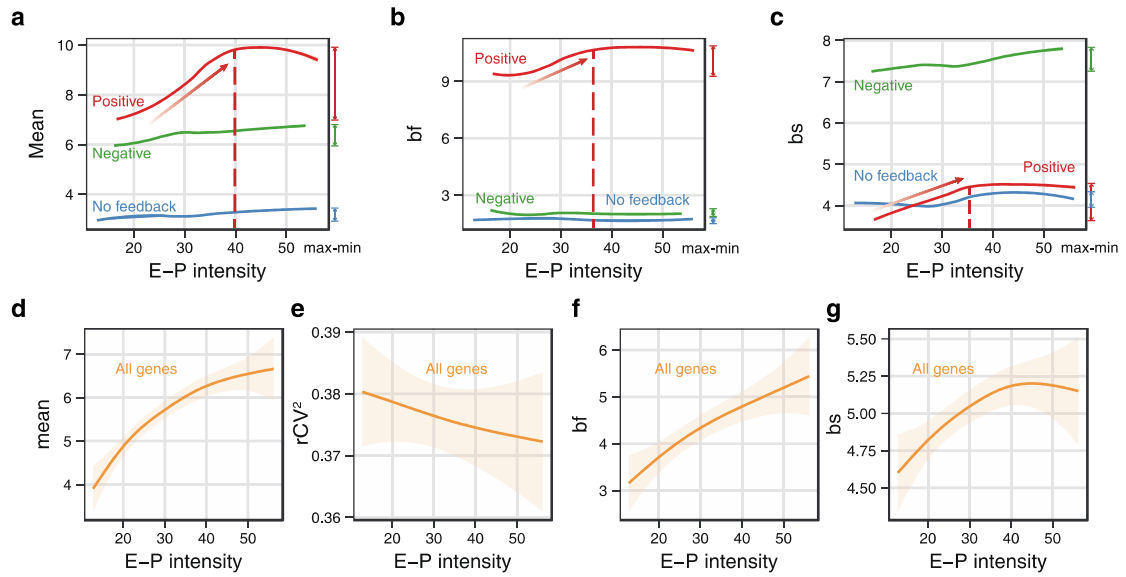

**Supplementary Figure S12. Synergic effects of enhancer-promoter interaction and feedback regulation on burst kinetics.** (a-c) Correlations between enhancer-promoter (E-P) interaction intensity and mean gene-expression levels (a), burst frequencies (b) or burst sizes (c) in three cases of different feedbacks, where the dashed line represents the peak value in case of positive feedback and the line segment on the right-hand side of the picture represents the maximum minus the minimum, that is, the amplitude of affecting kinetic parameters (mean levels, burst frequencies and burst sizes). Color: positive feedback (red line), non-feedback (blue line) and negative feedback (green line). (d-g) Correlations between E-P interaction intensity and mean gene-expression levels (d), variability ( $rCV^2$ , e), burst frequencies (f) or burst sizes (g) for all genes.

### 3. Supplementary Table

**Supplementary Table S1: The predicted feedback loop of genes that verified by publications.**

| Gene name | Feedback Type | PMID (or DOI)                 | Gene name | Feedback Type | PMID (or DOI) |
|-----------|---------------|-------------------------------|-----------|---------------|---------------|
| Acta1     | Positive      | 32087752                      | Cdkn1a    | Positive      | 20160708      |
| Acta2     | Positive      | 26559755                      | Cebpd     | Positive      | 25591788      |
| Actn1     | Positive      | 16736472                      | Clic1     | Positive      | 32905514      |
| Adamts5   | Positive      | 18328163                      | Clic4     | Positive      | 31879279      |
| Adipor1   | Positive      | 33359123                      | Cnbp      | Positive      | 28168305      |
| Aebp1     | Positive      | 32565808                      | Cnn2      | Positive      | 24464300      |
| Ahnak     | Positive      | 21940993                      | Col6a3    | Positive      | 33214660      |
| Akt1      | Positive      | 26235620                      | Commd1    | Positive      | 26586569      |
| Aldh18a1  | Positive      | 32075946                      | Ctgf      | Positive      | 23259531      |
| Aldoa     | Positive      | 32530543                      | Ctsl      | Positive      | 33919392      |
| Angptl2   | Positive      | 33747748                      | Cxcl5     | Positive      | 35116536      |
| Ankrd11   | Positive      | 20452957                      | Ddah1     | Positive      | 23717555      |
| Anxa2     | Positive      | 33712571                      | Dhx9      | Positive      | 35590370      |
| Aprt      | Positive      | 16105024                      | Ecm1      | Positive      | 27075243      |
| Arpc4     | Positive      | 34836783                      | Eif3i     | Positive      | 25147179      |
| Atf5      | Positive      | 29137451                      | Ensa      | Positive      | 21164013      |
| Basp1     | Positive      | 33042262                      | Ephx1     | Positive      | 30293161      |
| Bdnf      | Positive      | 25171395                      | Fasn      | Positive      | 21643005      |
| Bgn       | Positive      | 33117706                      | Fhl2      | Positive      | 16343438      |
| Brd2      | Positive      | 21068722                      | Fstl1     | Positive      | 18519848      |
| Bsg       | Positive      | 10.1101/2021.1<br>1.29.470317 | Fxyd5     | Positive      | 31746425      |
|           |               |                               | Fzd7      | Positive      | 35942683      |
| Btg2      | Positive      | 11989967                      | Gng10     | Positive      | 34429144      |
| Cald1     | Positive      | 26926107                      | Gng11     | Positive      | 26926107      |
| Cap1      | Positive      | 34099549                      | Golm1     | Positive      | 35805075      |
| Ccdc104   | Positive      | 23303910                      | Grb10     | Positive      | 15901248      |
| Cck       | Positive      | 12829630                      | Hbegf     | Positive      | 31033049      |
| Ccl2      | Positive      | 27888616                      | Hbp1      | Positive      | 28348080      |
| Ccl7      | Positive      | 35715847                      | Hdgf      | Positive      | 26296979      |
| Cct2      | Positive      | 33268369                      | Hmga1     | Positive      | 31814893      |
| Cd81      | Positive      | 10.1101/2022.0<br>2.23.481674 | Hnrnpc    | Positive      | 35661832      |
|           |               |                               | Hnrnpm    | Positive      | 35158098      |
| Cdc37     | Positive      | 12435747                      | Htra1     | Positive      | 22949504      |
| Cdc42se1  | Positive      | 30754684                      | Il1rl1    | Positive      | 35578178      |
| Cdk1      | Positive      | 22726437                      | Klf6      | Positive      | 33734616      |
| Cdk4      | Positive      | 10235368                      | Ldha      | Positive      | 35359405      |
| Cdk5      | Positive      | 11050161                      | Lox       | Positive      | 21643005      |

(Continued to Supplementary Table S1)

| <b>Gene name</b> | <b>Feedback Type</b> | <b>PMID (or DOI)</b>          | <b>Gene name</b> | <b>Feedback Type</b> | <b>PMID (or DOI)</b> |
|------------------|----------------------|-------------------------------|------------------|----------------------|----------------------|
| Ltbr             | Positive             | 29769272                      | Wnk1             | Positive             | 35691270             |
| Malat1           | Positive             | 26735578                      | Ythdf2           | Positive             | 34160549             |
| Meg3             | Positive             | 33602903                      | Abi1             | Negative             | 11208021             |
| Mmp14            | Positive             | 31298339                      | Adam9            | Negative             | 34671207             |
| Ncl              | Positive             | 25938538                      | Alas1            | Negative             | 29364890             |
| Neat1            | Positive             | 33253679                      | Anxa1            | Negative             | 27105503             |
| Nisch            | Positive             | 35108640                      | Atf4             | Negative             | 27629041             |
| Pak2             | Positive             | 12226077                      | Bin1             | Negative             | 30733337             |
| Pdrg1            | Positive             | 34812552                      | Bmp1             | Negative             | 25701650             |
| Pgk1             | Positive             | 30537744                      | Calm1            | Negative             | 29657261             |
| Plk2             | Positive             | 29448085                      | Camk2g           | Negative             | 16002660             |
| Postn            | Positive             | 10.1161/CIRCRESAHA.120.316943 | Ccm2             | Negative             | 29364115             |
|                  |                      |                               | Chd4             | Negative             | 25453762             |
|                  |                      |                               | Chpf             | Negative             | 33809195             |
| Prdx6            | Positive             | 31007045                      | Ckap4            | Negative             | 27322059             |
| Psm1             | Positive             | 10.1182/blood-2019-126963     | Col4a2           | Negative             | 35532293             |
|                  |                      |                               | Dad1             | Negative             | 31123095             |
| Psm3             | Positive             | 10.1182/blood-2019-126963     | Ddr2             | Negative             | 22832484             |
|                  |                      |                               | Ddx24            | Negative             | 24204270             |
| Ptpn11           | Positive             | 30355677                      | Dhrs3            | Negative             | 28207193             |
| Rbfox2           | Positive             | 31241461                      | Dnajc3           | Negative             | 33210431             |
| Rock2            | Positive             | 27724862                      | Drap1            | Negative             | 12471260             |
| Rpl23            | Positive             | 28539603                      | Eif3h            | Negative             | 29136179             |
| Rraga            | Positive             | 35739524                      | Erp29            | Negative             | 21419175             |
| S100a10          | Positive             | 30675195                      | Fabp5            | Negative             | 31883840             |
| Sdpr             | Positive             | 30879950                      | Gas5             | Negative             | 35706414             |
| Serpine2         | Positive             | 33760135                      | Gba              | Negative             | 33617695             |
| Sh3bgrl3         | Positive             | 33839406                      | Gpc1             | Negative             | 31355137             |
| Son              | Positive             | 27293512                      | Herc2            | Negative             | 31665549             |
| Sox4             | Positive             | 30906628                      | Hnrnpa0          | Negative             | 35879279             |
| Sparc            | Positive             | 18542844                      | Iqgap1           | Negative             | 22328503             |
| Tagln2           | Positive             | 27402267                      | Kras             | Negative             | 24755884             |
| Thbs1            | Positive             | 32853092                      | Lamp1            | Negative             | 29644770             |
| Timp1            | Positive             | 35961511                      | Lats2            | Negative             | 27006470             |
| Tspo             | Positive             | 33066460                      | Loxl1            | Negative             | 29164236             |
| Uba2             | Positive             | 35661832                      | Ly6e             | Negative             | 31684192             |
| Unc5b            | Positive             | 32141538                      | Map2k2           | Negative             | 29023632             |
| Uqcr10           | Positive             | 34860557                      | Nedd4            | Negative             | 31787758             |
| Wisp2            | Positive             | 30651114                      | Nolc1            | Negative             | 24154670             |

(Continued to Supplementary Table S1)

| <b>Gene name</b> | <b>Feedback Type</b> | <b>PMID (or DOI)</b>      | <b>Gene name</b> | <b>Feedback Type</b> | <b>PMID (or DOI)</b>      |
|------------------|----------------------|---------------------------|------------------|----------------------|---------------------------|
| Npm1             | Negative             | 23874639                  | Smarca4          | Negative             | 30297712                  |
| Nrp2             | Negative             | 29130509                  | Srsf2            | Negative             | 25818199                  |
| Pgd              | Negative             | 33241112                  | Ssrp1            | Negative             | 26755331                  |
| Prrc1            | Negative             | 34295164                  | Stat3            | Negative             | 24973454                  |
| Rab7             | Negative             | 29296513                  | Tardbp           | Negative             | 33137311                  |
| Rab8a            | Negative             | 22219378                  | Thoc7            | Negative             | 10.1101/2021.09.07.459221 |
| Rac1             | Negative             | 27136688                  |                  |                      |                           |
| Rb1cc1           | Negative             | 33340270                  | Tmed9            | Negative             | 35805075                  |
| Rbm39            | Negative             | 10.1101/2022.08.30.505862 | Tnk2             | Negative             | 26677978                  |
|                  |                      |                           | Trim3            | Negative             | 30542119                  |
| Rdx              | Negative             | 16651542                  | Trip12           | Negative             | 22497224                  |
| Rhoa             | Negative             | 27136688                  | Trip6            | Negative             | 32104300                  |
| Rpl22            | Negative             | 23990801                  | Tspan31          | Negative             | 24565034                  |
| Rps3             | Negative             | 20217897                  | Ubxn4            | Negative             | 34021047                  |
| Sar1a            | Negative             | 10.1101/2022.07.21.501000 | Usp14            | Negative             | 30021169                  |



#### 4. Reference

1. Sarkar, A. and Stephens, M. (2021) Separating measurement and expression models clarifies confusion in single-cell RNA sequencing analysis. *Nat. Genet.*, **53**, 770-777.
2. Raharinirina, N.A., Peppert, F., von Kleist, M., Schütte, C. and Sunkara, V. (2021) Inferring gene regulatory networks from single-cell RNA-seq temporal snapshot data requires higher-order moments. *Patterns*, **2**, 100332.
3. Liu, Y., Beyer, A. and Aebersold, R. (2016) On the dependency of cellular protein levels on mRNA abundance. *Cell*, **165**, 535-550.
4. To, T.-L. and Maheshri, N. (2010) Noise can induce bimodality in positive transcriptional feedback loops without bistability. *Science*, **327**, 1142-1145.
5. Gupta, A., Martin-Rufino, J.D., Jones, T.R., Subramanian, V., Qiu, X., Grody, E.I., Bloemendal, A., Weng, C., Niu, S.-Y. and Min, K.H. (2022) Inferring gene regulation from stochastic transcriptional variation across single cells at steady state. *Proc. Natl. Acad. Sci. U. S. A.*, **119**, e2207392119.
6. Shahrezaei, V. and Swain, P.S. (2008) Analytical distributions for stochastic gene expression. *Proc. Natl. Acad. Sci. U. S. A.*, **105**, 17256-17261.
7. Friedman, N., Cai, L. and Xie, X.S. (2006) Linking stochastic dynamics to population distribution: an analytical framework of gene expression. *Phys. Rev. Lett.*, **97**, 168302.
8. Peccoud, J. and Ycart, B. (1995) Markovian modeling of gene-product synthesis. *Theor. Popul. Biol.*, **48**, 222-234.
9. Kim, J.K. and Marioni, J.C. (2013) Inferring the kinetics of stochastic gene expression from single-cell RNA-sequencing data. *Genome Biol.*, **14**, R7.
10. Hildebrand, B.F. (1987) *Introduction to numerical analysis*. 2nd ed. Dover, New York.
